# Supplementary material for: Polyphenolic Compound Variation in Globe Artichoke Cultivars as Affected by Fertilization and Biostimulants Application
Source: MDPI journal article supplement (doi:10.3390/plants11152067), 2022-08-08
Supplement: s1 [file s1]

**Supplementary Table S1.** complete scheme of analysis of variance and of the interaction between all the main factors on the polyphenols content in artichoke heads.

|                    | 1-<br>Caffeoyl<br>quinic<br>acid | 3-<br>Caffeoyl<br>quinic<br>acid | 4-<br>Caffeoyl<br>quinic<br>acid | 5-<br>Caffeoyl<br>quinic<br>acid | Caffeic<br>Acid | 1,3-<br>Dicaffeoylquinic<br>acid | 1,5-<br>Dicaffeoylquinic<br>acid | TOTAL<br>Caffeoyl<br>quinic<br>acid | Luteolin<br>rutinosi<br>de | Luteolin<br>glucosid<br>e | Luteolin<br>glucuro<br>n | Luteolin | TOTAL<br>Luteolin | Apigeni<br>n<br>rutinosi<br>de | Apigeni<br>n 7-O<br>glucos | Apigeni<br>n 7-O<br>glucur | TOTAL<br>Apigeni<br>n |
|--------------------|----------------------------------|----------------------------------|----------------------------------|----------------------------------|-----------------|----------------------------------|----------------------------------|-------------------------------------|----------------------------|---------------------------|--------------------------|----------|-------------------|--------------------------------|----------------------------|----------------------------|-----------------------|
| Year (Y)           | **                               | **                               | **                               | **                               | **              | **                               | **                               | **                                  | **                         | **                        | **                       | **       | **                | **                             | **                         | **                         | **                    |
| Cultivar (C)       |                                  | *                                |                                  | *                                |                 |                                  | *                                | *                                   | **                         |                           |                          | *        |                   |                                |                            |                            |                       |
| Nitrogen (N)       |                                  |                                  |                                  |                                  |                 |                                  |                                  |                                     |                            |                           |                          |          |                   |                                |                            |                            |                       |
| Biostimul. (B)     |                                  |                                  |                                  |                                  |                 |                                  |                                  |                                     | *                          |                           |                          |          |                   |                                |                            |                            |                       |
| Head Parts<br>(HP) | **                               | **                               | **                               | **                               | **              | **                               | **                               | **                                  | **                         | **                        |                          |          | **                | **                             | *                          | *                          | *                     |
| Y*C                | **                               | **                               | **                               | **                               | **              | **                               | **                               | **                                  |                            | **                        | **                       | **       |                   | **                             | **                         | **                         | **                    |
| Y*N                | **                               | **                               | **                               | **                               | **              | **                               | **                               | **                                  | **                         | **                        | **                       | **       | **                | **                             | **                         | **                         | **                    |
| Y*HP               | **                               | **                               | **                               | **                               | **              | **                               | **                               | **                                  | **                         | **                        | **                       | **       | **                | **                             | **                         | **                         | **                    |
| Y*B                | **                               | **                               | **                               | **                               | **              | **                               | **                               | **                                  |                            | **                        | **                       | **       | **                | **                             | **                         | **                         | **                    |
| C*HP               | **                               | *                                |                                  | **                               |                 |                                  | *                                | *                                   | **                         | **                        |                          | *        | *                 | *                              |                            |                            |                       |
| C*B                |                                  |                                  |                                  |                                  |                 | *                                |                                  |                                     |                            |                           | *                        |          |                   |                                |                            |                            |                       |
| N*HP               |                                  |                                  |                                  | **                               |                 | *                                | *                                | *                                   | **                         |                           |                          |          |                   | **                             |                            |                            |                       |
| N*B                |                                  |                                  |                                  |                                  |                 |                                  |                                  |                                     | **                         |                           |                          | *        |                   |                                | **                         | **                         | *                     |
| B*HP               |                                  | *                                |                                  | *                                |                 |                                  | **                               | **                                  | **                         |                           |                          |          |                   |                                |                            |                            |                       |
| C*N*Y              | **                               | **                               | **                               | **                               | **              | **                               | **                               | **                                  | **                         | **                        | **                       | **       | **                | **                             | **                         | **                         | **                    |
| C*B*Y              | **                               | **                               | **                               | **                               | **              | **                               | **                               | **                                  |                            | **                        | **                       | **       | **                | **                             | *                          | *                          | **                    |
| C*HP*Y             | **                               | **                               | **                               | **                               | **              | **                               | **                               | **                                  | **                         | **                        | **                       | **       | **                | **                             | **                         | **                         | **                    |
| N*B*Y              | **                               | **                               | **                               | **                               | **              | **                               | **                               | **                                  | **                         | **                        | **                       | **       | **                | **                             | **                         | **                         | **                    |
| N*HP*Y             | **                               | **                               | **                               | **                               | **              | **                               | **                               | **                                  | **                         | **                        | **                       | **       | **                | **                             | **                         | **                         | **                    |
| B*HP*Y             | **                               | **                               | **                               | **                               | **              | **                               | **                               | **                                  | **                         | **                        | **                       | **       | *                 | **                             | **                         | **                         | **                    |
| C*N*B              |                                  |                                  |                                  | *                                |                 |                                  |                                  |                                     |                            |                           |                          | *        |                   |                                |                            |                            |                       |
| C*N*HP             |                                  | *                                |                                  |                                  |                 |                                  | **                               | **                                  | **                         |                           |                          |          |                   | **                             |                            |                            |                       |
| C*B*HP             | *                                | *                                |                                  | **                               |                 | *                                |                                  |                                     |                            | *                         |                          |          | *                 | *                              | *                          | *                          | *                     |
| N*B*HP             |                                  | *                                |                                  | *                                |                 |                                  | **                               | **                                  | **                         |                           |                          |          |                   |                                |                            |                            |                       |
| C*N*B*Y            | **                               | **                               | **                               | **                               | **              | **                               | **                               | **                                  | **                         | **                        | **                       | **       | **                | **                             | **                         | **                         | **                    |
| C*N*HP*Y           | **                               | **                               | **                               | **                               | **              | **                               | **                               | **                                  | **                         | **                        | **                       | **       | **                | **                             | **                         | **                         | **                    |
| C*HP*B*Y           | **                               | **                               | **                               | **                               | **              | **                               | **                               | **                                  | *                          | **                        | **                       | **       | **                | **                             | **                         | **                         | **                    |
| HP*N*B*Y           | **                               | **                               | **                               | **                               | **              | **                               | **                               | **                                  | **                         | **                        | **                       | **       | **                | **                             | **                         | **                         | **                    |
| C*N*B*HP           |                                  |                                  |                                  | **                               | *               |                                  | **                               | **                                  | **                         |                           |                          |          |                   |                                |                            |                            |                       |

\*, \*\* = Significant at P < 0.05, P < 0.01 probability levels, respectively. Empty cell=not significant
